# Supplementary material for: Assessment of permafrost distribution maps in the Hindu Kush Himalayan region using rock glaciers mapped in Google Earth
Source: Copernicus journal article supplement (doi:10.5194/tc-9-2089-2015), 2015-11-11
Supplement: Supplementary file 1 [file tc-9-2089-2015-supplement.zip]

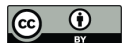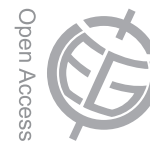

## *Supplement of*

# **Assessment of permafrost distribution maps in the Hindu Kush Himalayan region using rock glaciers mapped in Google Earth**

**M.-O. Schmid et al.**

*Correspondence to:* M.-O. Schmid ([marcolivier.schmid@gmail.com](mailto:marcolivier.schmid@gmail.com))

- [tc-9-2089-2015-supplement-title-page.pdf](#)
- [HKH Outline.rar](#)
- [Manual\\_Rock\\_Glacier\\_Mapping\\_GE.pdf](#)
- [Rock glacier mapping.kml](#)
- [f.RandomPolygon.R](#)

The copyright of individual parts of the supplement might differ from the CC-BY 3.0 licence.
